# Supplementary material for: Langerhans cells and cDC1s play redundant roles in mRNA-LNP induced protective anti-influenza and anti-SARS-CoV-2 responses
Source: PubMed Central journal article supplement — bioRxiv. 2021 Aug 2:2021.08.01.454662. Preprint. [Version 1] doi: 10.1101/2021.08.01.454662 (PMC8351776; doi:10.1101/2021.08.01.454662), 2021-08-02

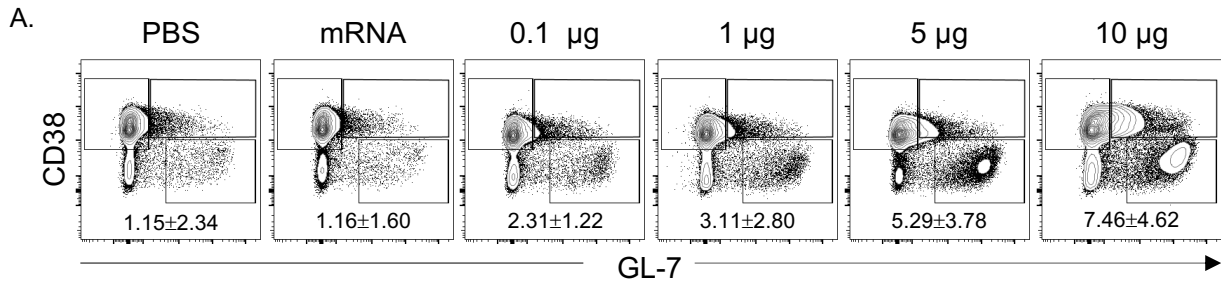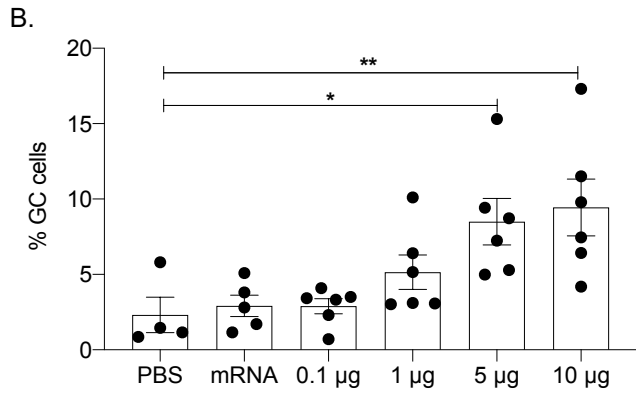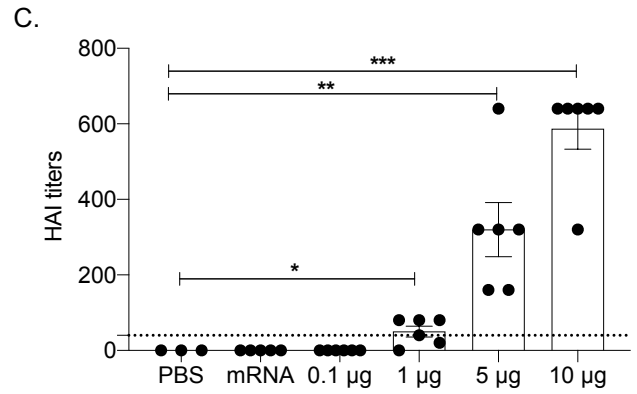

Supplement: media-2.pdf [file media-2.pdf]
